# Supplementary material for: Influence of the Text Neck Posture on the Static Dental Occlusion
Source: MDPI journal article supplement (doi:10.3390/medicina58091303), 2022-09-18
Supplement: s1 [file s1]

**Table S1** Values of the occlusal parameters measured in the normal, neutral head position (N) and in the text neck posture (30) in the 19 healthy subjects with normal occlusal relationships

| Nr  | Patient | Gender | Age (years) | Right % of occlusal force | Left % of occlusal force | Difference R-L % AOF | %MMF | OT (s) | MAT-OTB (s) |
|-----|---------|--------|-------------|---------------------------|--------------------------|----------------------|------|--------|-------------|
| 1.  | CAMN    | Female | 21          | 41                        | 59                       | -18                  | 98.7 | 2.1    | 0.88        |
|     | CAM20   | Female | 21          | 45.4                      | 54.6                     | -9.2                 | 98.1 | 0.85   | 3.45        |
| 2.  | AMN     | Female | 21          | 55.4                      | 44.6                     | 10.8                 | 98.9 | 2.65   | 0.4         |
|     | AM20    | Female | 21          | 53.4                      | 46.6                     | 6.8                  | 98.3 | 0.45   | 0.55        |
| 3.  | NAN     | Female | 21          | 55                        | 45                       | 10                   | 97.4 | 0.32   | 1.04        |
|     | NA20    | Female | 21          | 66.3                      | 33.7                     | 32.6                 | 99.6 | 1.28   | 0.1         |
| 4.  | BMN     | Male   | 22          | 40.9                      | 59.1                     | -18.2                | 99.2 | 5.99   | 3.05        |
|     | BM20    | Male   | 22          | 38.6                      | 61.4                     | -22.8                | 98.8 | 0.4    | 0.93        |
| 5.  | BCN     | Female | 21          | 35.3                      | 64.7                     | -29.4                | 97.6 | 0.54   | 1.98        |
|     | BC20    | Female | 21          | 59.7                      | 40.3                     | 19.4                 | 95.1 | 0      | 0.93        |
| 6.  | CMN     | Female | 21          | 34                        | 66                       | -32                  | 98.3 | 6.35   | 1.95        |
|     | CM20    | Female | 21          | 29                        | 71                       | -42                  | 98.1 | 2.67   | 4.54        |
| 7.  | DIPN    | Male   | 21          | 64.2                      | 35.8                     | 28.4                 | 99.2 | 0.22   | 0.18        |
|     | DIP20   | Male   | 21          | 71.6                      | 28.4                     | 43.2                 | 98.2 | 6.48   | 0.49        |
| 8.  | DDN     | Female | 22          | 44                        | 56                       | -12                  | 99.7 | 0.26   | 1.95        |
|     | DD20    | Female | 22          | 44.8                      | 55.2                     | -10.4                | 92.2 | 0.88   | 0.01        |
| 9.  | TEN     | Female | 21          | 53.6                      | 46.4                     | 7.2                  | 96.9 | 0.41   | 3.5         |
|     | TE20    | Female | 21          | 62.1                      | 37.9                     | 24.2                 | 99.5 | 2.68   | 0.11        |
| 10. | FAN     | Female | 21          | 45.6                      | 54.4                     | -8.8                 | 90.7 | 0.74   | 6.05        |
|     | FA20    | Female | 21          | 32.6                      | 67.4                     | -34.8                | 93.9 | 0.25   | 1.59        |
| 11. | WHN     | Female | 20          | 55.3                      | 44.7                     | 10.6                 | 96.7 | 1.46   | 0           |
|     | WH20    | Female | 20          | 50.8                      | 49.2                     | 1.6                  | 89.6 | 0.36   | 9.63        |
| 12. | MCN     | Female | 24          | 45.3                      | 54.7                     | -9.4                 | 89.8 | 0.3    | 0.4         |
|     | MC20    | Female | 24          | 52.8                      | 47.2                     | 5.6                  | 94.9 | 0.19   | 1.06        |
| 13. | MPN     | Male   | 21          | 33.8                      | 66.2                     | -32.4                | 99   | 1.52   | 2.32        |
|     | MP20    | Male   | 21          | 38.9                      | 61.1                     | -22.2                | 93.1 | 0.43   | 0.85        |
| 14. | MAN     | Male   | 21          | 64.4                      | 35.6                     | 28.8                 | 95.1 | 0.4    | 3.37        |
|     | MA20    | Male   | 21          | 43.7                      | 56.3                     | -12.6                | 99.8 | 0.49   | 0.47        |
| 15. | AON     | Female | 21          | 50.5                      | 49.5                     | 1                    | 98.2 | 1.09   | 3.16        |
|     | AO20    | Female | 21          | 50.7                      | 49.3                     | 1.4                  | 96.5 | 1.65   | 1.25        |
| 16. | SEN     | Female | 23          | 48                        | 52                       | -4                   | 100  | 0.37   | 6.12        |
|     | SE20    | Female | 23          | 54.6                      | 45.4                     | 9.2                  | 96.2 | 5.29   | 0           |
| 17. | MAN     | Female | 21          | 52                        | 48                       | 4                    | 99.9 | 0.24   | 2.26        |
|     | MA20    | Female | 21          | 59.9                      | 40.1                     | 19.8                 | 97.7 | 0.33   | 1.39        |
| 18. | DDN     | Female | 20          | 43.3                      | 56.7                     | -13.4                | 98.2 | 0.39   | 0.25        |
|     | DD20    | Female | 20          | 46.1                      | 53.9                     | -7.8                 | 99.7 | 0.26   | 0.15        |
| 19. | DMEN    | Female | 22          | 52.2                      | 47.8                     | 4.4                  | 99   | 0.06   | 0.66        |
|     | DME20   | Female | 22          | 41.4                      | 58.5                     | -17.1                | 90.6 | 0.09   | 0.11        |
